# Supplementary material
Source: Springer Nature journal article supplement (https://www.springermedizin.de/resource/supplementary/12993_2012_405_MOESM5_ESM.pdf/9617740)

**A**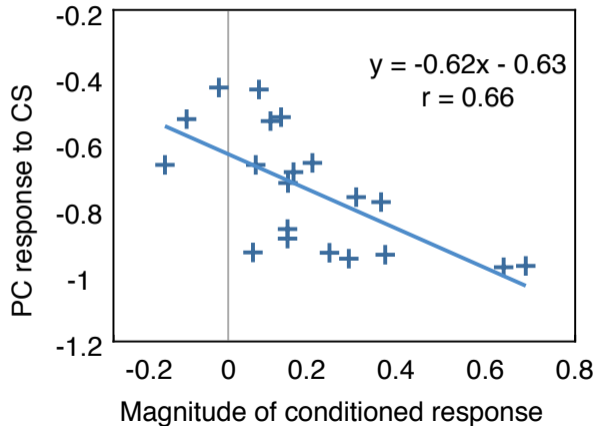**B**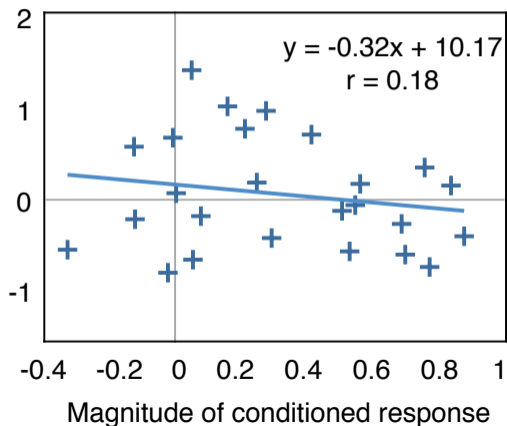

Supplement: MOESM5 [file 9617740]
